# Supplementary material for: Prickle3 synergizes with Wtip to regulate basal body organization and cilia growth
Source: PubMed Central journal article supplement (PMC4827067; doi:10.1038/srep24104), 2016-04-11

## Supplementary Information:

### Prickle3 synergizes with Wtip to regulate basal body organization and cilia growth.

Chih-Wen Chu, Olga Ossipova, Andriani Ioannou and Sergei Y. Sokol\*

#### Supplementary Figure 1.

##### Pk3 lacking the C-terminal fragment does not affect GRP cilia.

Embryos were injected with 2 ng of RNAs encoding GFP (A, A') or GFP-Pk3 $\Delta$ C (B, B'). Cilia were visualized by immunostaining of acetylated  $\alpha$ -tubulin (Ac-tub) in GRP cells at stage 17. ZO-1 co-staining reveals cell boundaries. *En face* staining is shown, anterior is up.

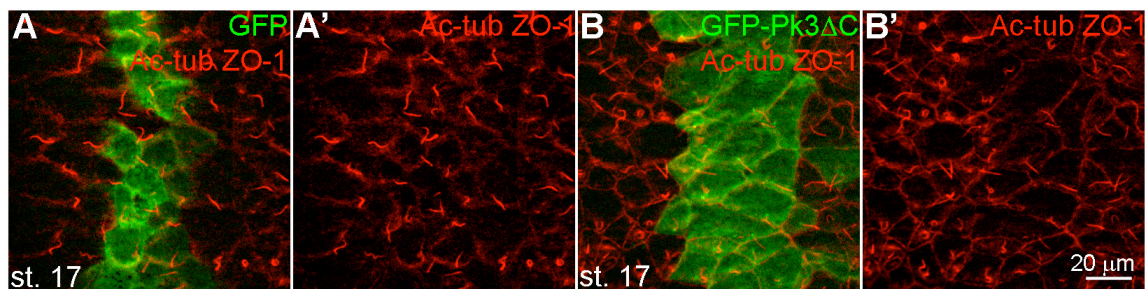

#### Supplementary Figure 2.

##### Establishing basal body marker specificity in GRP cells.

GRP explants of stage 17 embryos were co-immunostained for  $\gamma$ -tubulin and Centrin1 (A-A'') or Nedd1 (B-B''). Both Centrin1 and Nedd1 colocalize with  $\gamma$ -tubulin at the basal body in the GRP. *En face* staining is shown, anterior is up.

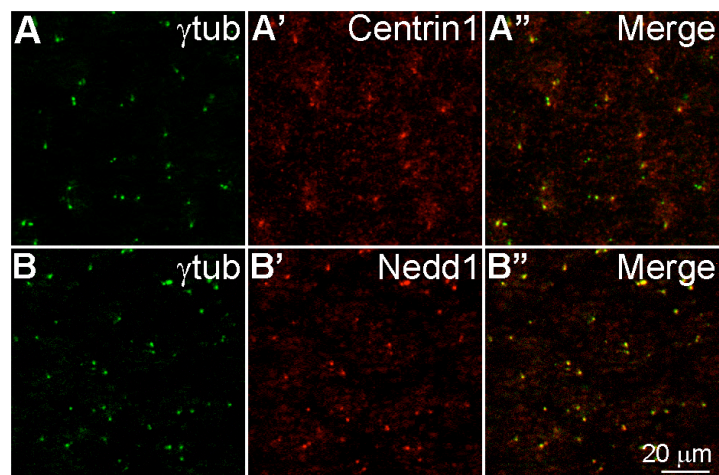

### Supplementary Figure 3.

#### Expression of *Wtip* and *Pk3* in *Xenopus* early embryos.

GRP explants and whole embryos were subjected to wholemount *in situ* hybridization with *Wtip* or *Pk3* anti-sense or control sense RNA probes as indicated. (A, B) Stage 10+ gastrulae. *Wtip* transcripts are weakly detected in the animal pole ectoderm when compared to the embryo hybridized with the corresponding sense probe. Animal pole is up. (C-E) Stage 18 neurulae. *Wtip* transcripts are detected in both neural and non-neural ectoderm. The neural folds and the neural crest area are strongly positive. (A-E) Anterior is to the left. (A, B, D) Lateral view, (C, E) dorsal view. (F, G) Both *Pk3* and *Wtip* RNAs are present in the ventral side of GRP explants that were prepared prior to *in situ* hybridization from stage 17/18 embryos. For both anti-sense probes, staining appears stronger at the midline than in the adjacent endoderm. Ventral view is shown, anterior is up. (H-J) Transverse sections of the explants shown in (F, G). *Wtip* RNA is predominantly in the neural tissue, with lower levels in the GRP (arrow) and the mesoderm (I). *Pk3* transcripts are present at the GRP midline (arrow), epidermis and the superficial layer of the neural plate (J). Notochord, N, is indicated by dashed outline.

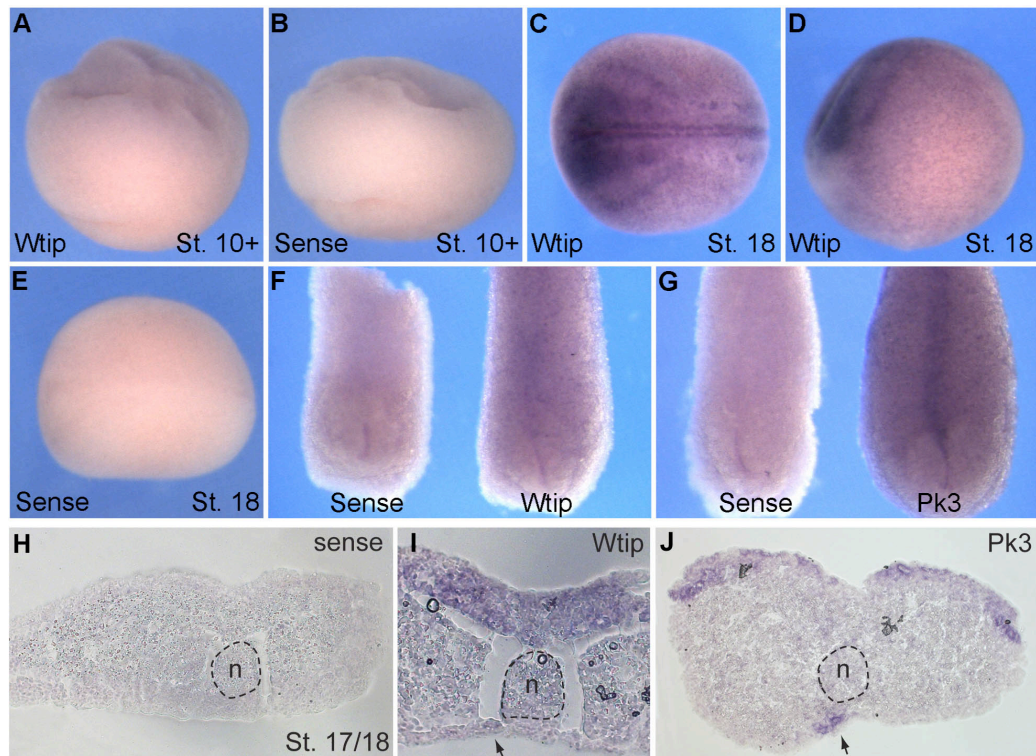

#### Supplementary Figure 4.

##### **Pk3 becomes polarized in the epidermis in the presence of Vangl2.**

Embryos were injected with 100 pg of pCS2-FLAG-GFP-Pk3 DNA (A, B) or 150 pg of GFP-Pk3 RNA plus 150 pg of HA-Vangl2 (VL2) RNA (C-F). Pk3 polarity was visualized by GFP fluorescence in the epidermis of fixed stage 30 embryos. In the absence of HA-Vangl2, fluorescence of injected GFP-Pk3 RNA is not visible at this stage (data not shown). No cortical Pk3 polarization is detectable in representative non-ciliated (A) or ciliated (B) cells, but Pk3 was associated with basal bodies (B). (C-F) Examples of Pk3 polarization in the presence of Vangl2 in ciliated (C, D) and non-ciliated (E, F) cells. Cell borders are marked by co-injected membrane-associated mCherry RNA (Cherry, 100 pg). Asterisks mark the cells showing Pk3 polarization. The anterior-posterior (A-P) and the dorsal-ventral (D-V) axes indicated in E also refer to other panels. Six embryos from two independent experiments were examined. Pk3 was enriched posteriorly in 62 % of mosaically-expressing cells and anteriorly in 38 % of the cells (n = 34).

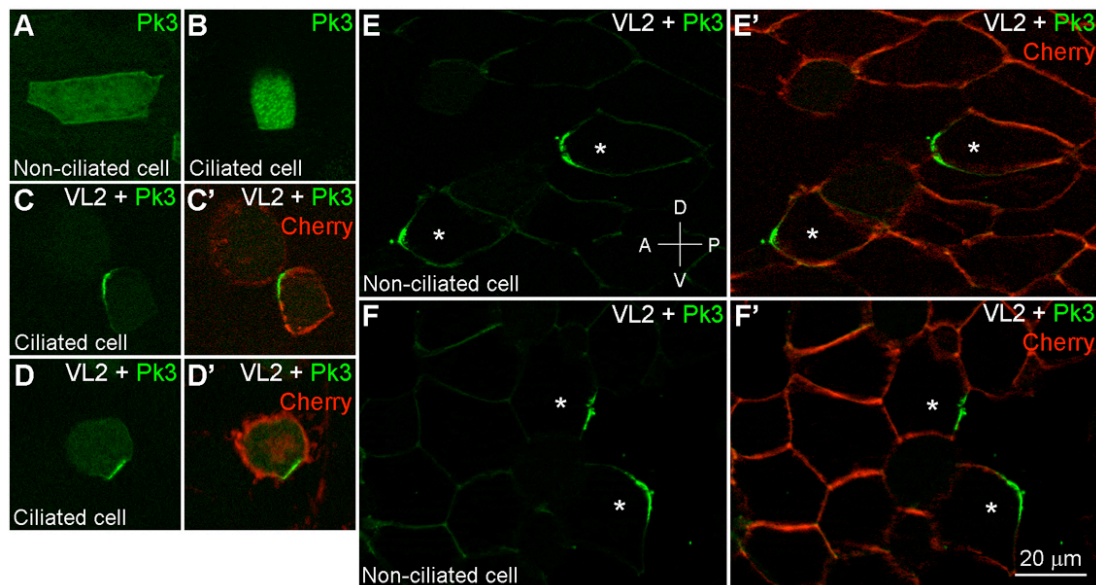

Supplement: srep24104-s1.pdf [file srep24104-s1.pdf]
